# Supplementary material for: Quantitative detection of ALK fusion breakpoints in plasma cell-free DNA from patients with non-small cell lung cancer using PCR-based target sequencing with a tiling primer set and two-step mapping/alignment
Source: PubMed Central journal article supplement (PMC6742348; doi:10.1371/journal.pone.0222233), 2019-09-12

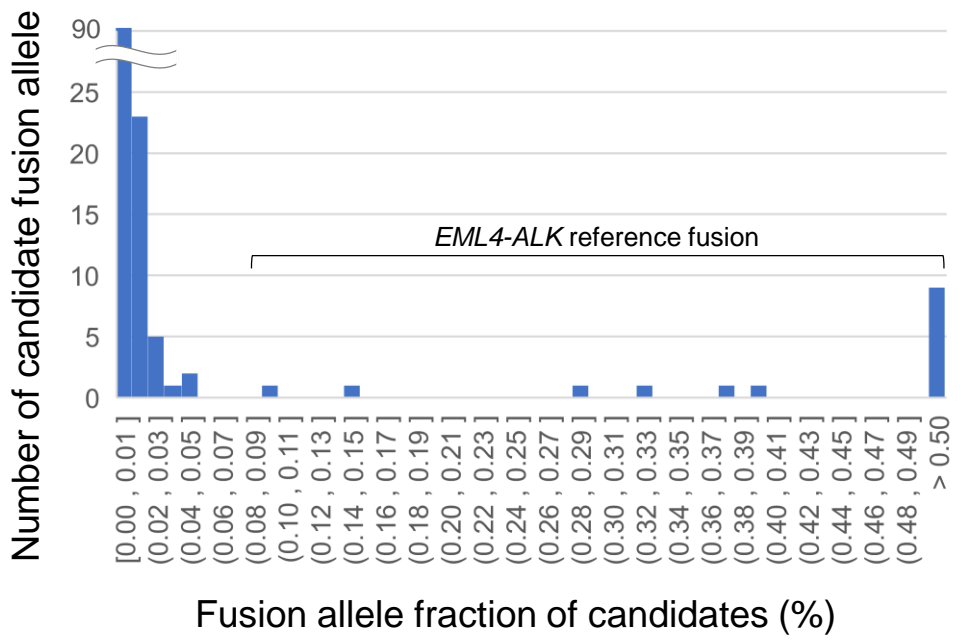

Supplement: pone.0222233.s001.pdf [file pone.0222233.s001.pdf]
